# Supplementary material for: Robust Linear Models for Cis-eQTL Analysis
Source: PubMed Central journal article supplement (PMC4436354; doi:10.1371/journal.pone.0127882), 2015-05-18
Supplement: pone.0127882.s004.pdf [file pone.0127882.s004.pdf]

## Supplementary Table 1: Simulation study 1 - contamination model

| alpha | 1-contamination | lm(cont) | rob.lm(cont) | lm(no cont) | rob.lm(no cont) |
|-------|-----------------|----------|--------------|-------------|-----------------|
| 0.050 | 0.90            | 0.049658 | 0.050639     | 0.049943    | 0.050303        |
| 0.050 | 0.92            | 0.049671 | 0.050490     | 0.050051    | 0.050398        |
| 0.050 | 0.94            | 0.049436 | 0.050168     | 0.050148    | 0.050395        |
| 0.050 | 0.96            | 0.049234 | 0.050143     | 0.049997    | 0.050110        |
| 0.050 | 0.98            | 0.050154 | 0.050386     | 0.050245    | 0.050305        |
| 0.050 | 1.00            | 0.050226 | 0.050499     | 0.050226    | 0.050499        |
| 0.010 | 0.90            | 0.009504 | 0.010202     | 0.009993    | 0.010241        |
| 0.010 | 0.92            | 0.009540 | 0.010387     | 0.010160    | 0.010340        |
| 0.010 | 0.94            | 0.009542 | 0.010312     | 0.010138    | 0.010379        |
| 0.010 | 0.96            | 0.009485 | 0.010233     | 0.010026    | 0.010219        |
| 0.010 | 0.98            | 0.009879 | 0.010375     | 0.010056    | 0.010259        |
| 0.010 | 1.00            | 0.010131 | 0.010403     | 0.010131    | 0.010403        |
| 0.001 | 0.90            | 0.000862 | 0.001032     | 0.000991    | 0.001070        |
| 0.001 | 0.92            | 0.000892 | 0.001093     | 0.001022    | 0.001112        |
| 0.001 | 0.94            | 0.000865 | 0.001084     | 0.001017    | 0.001082        |
| 0.001 | 0.96            | 0.000911 | 0.001087     | 0.001027    | 0.001104        |
| 0.001 | 0.98            | 0.000964 | 0.001068     | 0.001028    | 0.001087        |
| 0.001 | 1.00            | 0.001038 | 0.001122     | 0.001038    | 0.001122        |

Type-I error rates under the contamination model. Key: alpha = significance level, contamination = 1-contamination proportion, lm(cont) = type I error rate for the conventional model and contaminated data, rob.lm(cont) = type I error rate for the robust model and contaminated data, lm(no cont) = type I error rate for the conventional model and Gaussian data, rob.lm(no cont) = type I error rate for the robust model and Gaussian data.
