# Supplementary material for: Robust Linear Models for Cis-eQTL Analysis
Source: PubMed Central journal article supplement (PMC4436354; doi:10.1371/journal.pone.0127882), 2015-05-18
Supplement: pone.0127882.s005.pdf [file pone.0127882.s005.pdf]

## Supplmenetary Table 2: Simulation study 1 - contamination model

|                         | mean   | sd     |
|-------------------------|--------|--------|
| conventional (cont.)    | 0.4989 | 0.1702 |
| robust (cont.)          | 0.4986 | 0.1528 |
| conventional (no cont.) | 0.4996 | 0.1469 |
| robust (no cont.)       | 0.4993 | 0.1505 |

Estimates of  $\beta$  under the contamination model
