# Supplementary material for: Robust Linear Models for Cis-eQTL Analysis
Source: PubMed Central journal article supplement (PMC4436354; doi:10.1371/journal.pone.0127882), 2015-05-18
Supplement: pone.0127882.s006.pdf [file pone.0127882.s006.pdf]

### Supplementary Table 3: Simulation study 2 - heavy-tailed model

| alpha | DF | lm(cont) | rob.lm(cont) | lm(no cont) | rob.lm(no cont) |
|-------|----|----------|--------------|-------------|-----------------|
| 0.050 | 2  | 0.046566 | 0.050815     | 0.049803    | 0.049894        |
| 0.050 | 4  | 0.049715 | 0.050350     | 0.049955    | 0.050171        |
| 0.050 | 6  | 0.049937 | 0.049986     | 0.050156    | 0.050273        |
| 0.050 | 8  | 0.049929 | 0.050165     | 0.049830    | 0.049974        |
| 0.050 | 10 | 0.049776 | 0.049945     | 0.049995    | 0.050010        |
| 0.050 | 25 | 0.049862 | 0.049844     | 0.050154    | 0.050317        |
| 0.010 | 2  | 0.007710 | 0.010209     | 0.009974    | 0.010226        |
| 0.010 | 4  | 0.009452 | 0.010142     | 0.010013    | 0.010195        |
| 0.010 | 6  | 0.009785 | 0.010153     | 0.010006    | 0.010200        |
| 0.010 | 8  | 0.009946 | 0.010228     | 0.009968    | 0.010195        |
| 0.010 | 10 | 0.009921 | 0.010240     | 0.009958    | 0.010263        |
| 0.010 | 25 | 0.009904 | 0.010163     | 0.009907    | 0.010194        |
| 0.001 | 2  | 0.000556 | 0.001034     | 0.001021    | 0.001082        |
| 0.001 | 4  | 0.000852 | 0.001013     | 0.001035    | 0.001073        |
| 0.001 | 6  | 0.000949 | 0.001039     | 0.000975    | 0.001067        |
| 0.001 | 8  | 0.000978 | 0.001064     | 0.001019    | 0.001101        |
| 0.001 | 10 | 0.000961 | 0.001043     | 0.000941    | 0.001051        |
| 0.001 | 25 | 0.001008 | 0.001098     | 0.000967    | 0.001046        |

Type-I error rate heavy-tailed model. Key: alpha = significance level, DF = degrees of freedom of the error term t-distribution, lm(cont) = type I error rate for the conventional model and contaminated data, rob.lm(cont) = type I error rate for the robust model and contaminated data, lm(no cont) = type I error rate for the conventional model and Gaussian data, rob.lm(no cont) = type I error rate for the robust model and Gaussian data.
